# 1 On quantum computing and geometry 2 optimization

3 Ashar J. Malik<sup>1,\*</sup> and Chandra S. Verma<sup>1,2,3</sup>

4 <sup>1</sup>Bioinformatics Institute (A\*STAR), 30 Biopolis Street, 07-01 Matrix, Singapore  
5 138671, Singapore.

6 <sup>2</sup>Department of Biological Sciences, National University of Singapore, 14 Science  
7 Drive 4, Singapore 117543, Singapore.

8 <sup>3</sup>School of Biological Sciences, Nanyang Technological University, 60 Nanyang Drive,  
9 Singapore 637551, Singapore.

10 \*Correspondence to Ashar J. Malik: [asharjm@bii.a-star.edu.sg](mailto:asharjm@bii.a-star.edu.sg)

## 11 Abstract

12 Quantum computers have demonstrated advantage in tackling problems considered  
13 hard for classical computers and hold promise for tackling complex problems in molec-  
14 ular mechanics such as mapping the conformational landscapes of biomolecules. This  
15 work attempts to explore a few ways in which classical data, relating to the Cartesian  
16 space representation of biomolecules, can be encoded for interaction with empirical  
17 quantum circuits not demonstrating quantum advantage. Using the quantum circuit  
18 in a variational arrangement together with a classical optimizer, this work deals with  
19 the optimization of spatial geometries with potential application to molecular assem-  
20 blies. Additionally this work uses quantum machine learning for protein side-chain  
21 rotamer classification and uses an empirical quantum circuit for random state gener-  
22 ation for Monte Carlo simulation for side-chain conformation sampling. Altogether,  
23 this novel work suggests ways of bridging the gap between conventional problems in  
24 life sciences and how potential solutions can be obtained using quantum computers.  
25 It is hoped that this work will provide the necessary impetus for wide-scale adoption  
26 of quantum computing in life sciences.

## 27 Introduction

28 Three-dimensional (3D) [1] protein structures, experimentally determined using bio-  
29 physical techniques like nuclear magnetic resonance (NMR) and X-Ray crystallog-  
30 raphy [2], enable in-silico characterization of protein function. Routine techniques,  
31 like molecular dynamics (MD) simulations [3], Monte Carlo (MC) simulations [3] and  
32 molecular docking [4], build on 3D protein structure data and allow for determination  
33 of protein dynamics and substrate binding. This insight, achieved from in-silico meth-  
34 ods [5, 6, 7], is crucial in setting the course of, what is usually expensive, biochemical  
35 characterization carried out using laboratory assays.

36 Given that in-silico characterization is now an established aspect in translational  
37 studies, going from molecular effect prediction to laboratory-based verification, it is all  
38 the more important that algorithms utilize the existing hardware to the maximum and  
39 evolve with the advancements in hardware. An example of this can be seen with the  
40 adoption of artificial intelligence/machine learning (AI/ML) based methods in nearly  
41 all computational areas, especially drug discovery; one of the primary drivers of which  
42 is the advancements in graphics processing units (GPUs) [8]. Development of new  
43 algorithms in non-AI/ML areas utilizing the parallel-compute capability of GPUs, has  
44 allowed for advancements in other areas e.g, exponential speed-up of MD simulations  
45 [9, 10, 11] which now allow for large molecular assemblies to be observed over longer  
46 time-scales, offering better insights into the dynamics of these biomolecules.

47 Based on the fundamental principles of quantum mechanics, quantum computing  
48 is an emerging area which demonstrates potential to tackle hard problems, which are  
49 beyond the current capabilities of classical computers [12, 13]. Current state-of-the-  
50 art includes efforts in the area of quantum chemistry simulations [14, 15], machine  
51 learning [16, 17] and finance [18], with new algorithms, continuously being added to  
52 extend current capabilities e.g., QPacker [19], tackling the protein design problem  
53 and others [20, 21] for protein folding. Unlike scalability in the classical computing  
54 ecosystem, where new technologies are easily integrated and algorithms easily scaled  
55 to utilize the advance e.g., in the case of the use of GPUs with classical algorithms  
56 in the area of molecular dynamics simulations and machine learning to name a few,  
57 integration of existing algorithms with quantum computing is non-trivial. While

58 advancing at a significant rate, requiring a radical rethink about how algorithms are  
59 designed and deployed, quantum computing at present remains non-intuitive for the  
60 classical programming fraternity.

61 Quantum algorithms aim to achieve quantum advantage, which simply put, is  
62 the ability to solve problems that classical computers struggle with [22, 23, 24]. A  
63 quantum algorithm can broadly be decomposed into three parts, a) the data encoding  
64 step, b) the use of the quantum hardware to solve a particular problem of interest  
65 and lastly, c) converting the results into a form which is readily understandable, with  
66 steps “a” and “c” being inextricably linked. All aspects of quantum algorithms face  
67 challenges due to the non-intuitive nature of the hardware executing these.

68 In this work the area of molecular geometry optimization is explored. The work  
69 focuses on illustrating, without quantum advantage, encoding of classical molecular  
70 data for use with quantum hardware. Problem areas where classical data can inter-  
71 act with quantum hardware are demonstrated. In particular, this work demonstrates,  
72 using an empirical quantum circuit, optimization of positions of atoms and distances  
73 between them, a task frequently carried out in classical molecular mechanics, which  
74 demonstrates all three parts of a quantum algorithm. Dihedral data is used with  
75 a quantum support vector classifier to introduce machine learning capabilities. Ad-  
76 ditionally, empirical rotamer sampling is demonstrated using quantum Monte Carlo  
77 simulations.

78 To the best of our knowledge, this work is a first in presenting quantum mod-  
79 els that work with data from the area of classical molecular mechanics. Although  
80 achieving quantum advantage is beyond the scope of this work currently, it is ex-  
81 pected that this work will act as a primer for new users. By introducing a method to  
82 translate classical molecular data for use with quantum computers and giving exam-  
83 ples of problem areas where classical data can interact with quantum hardware, it is  
84 assumed that this work will help achieve solutions to classical problems beyond the  
85 capabilities of classical computers.

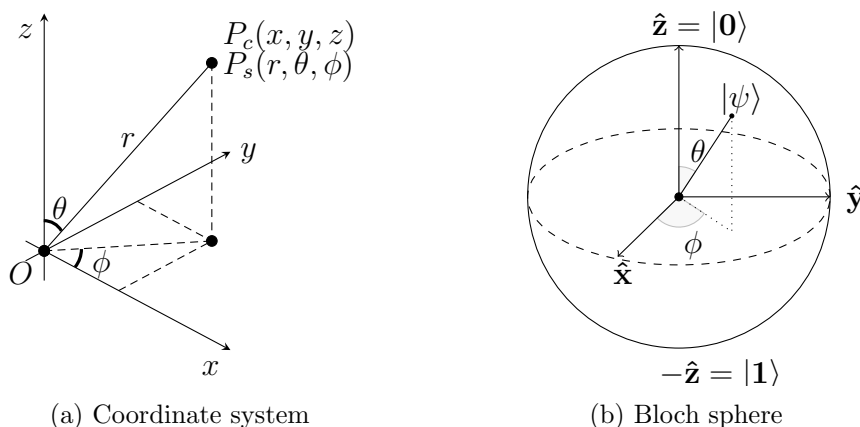

Figure 1: Coordinate systems and the Bloch sphere. a) Any cartesian coordinate  $(x, y, z)$  can be uniquely expressed as a spherical coordinate  $(r, \theta, \phi)$ , where  $r$  is the length of the line segment, and  $\theta$  and  $\phi$  are angles measured from the  $z$  and  $x$ -axes respectively. b) The Bloch sphere showing the state of a qubit  $\psi$  given by Equation 1 and can be set by using the UGate gate in the Qiskit SDK by setting the respective angles ( $\theta$  and  $\phi$ ).

## 86 Method

87 This work makes use of the open-source software development kit (SDK), Qiskit  
88 [25], using Python 3.7 through Anaconda. All work was carried out using quantum  
89 simulators. VMD [26] and NAMD [27] are used for handling and analysis of protein  
90 structure data.

91 In this work a number of models of quantum computation are presented. Briefly,  
92 these models demonstrate how classical molecular data can be encoded for use with  
93 quantum computers and how certain problems can be explored. These models are  
94 briefly introduced below.

### 95 Model 1: Encoding classical molecular data and molecular mechanics

96 Cartesian coordinates are commonly used when recording the positions of atoms,  
97 alone or constituting molecules. Three dimensional cartesian  $(x, y, z)$  coordinates can  
98 be readily converted to their equivalent spherical  $(r, \theta, \phi)$  coordinate forms, see Figure  
99 1(a), using empirical mathematical transformations.

100 A qubit state, represented by the Bloch sphere, see Figure 1 (b) is denoted by

$$|\psi\rangle = \alpha|0\rangle + \beta|1\rangle \quad (1)$$

101 where  $\alpha$  and  $\beta$  are probability amplitudes.

102 A qubit can be set to any arbitrary state, on the Bloch sphere using the generic  
103 single-qubit rotation gate, UGate, which accepts three Euler angles ( $\theta, \phi, \lambda$ ) as inputs.

104 Classical molecular mechanical algorithms optimize molecular geometries by intro-  
105 ducing variations in the observed state such that interatomic relationships converge  
106 to reference measures recorded, for the said atoms, in the force field [28]. These quan-  
107 tities comprise bonded terms, i.e., bonds, angles, dihedrals and non-bonded terms,  
108 i.e., van der Waal and electrostatic. This optimization can be reduced to a simple  
109 analogous problem where two vectors (a subject and a reference) are used to represent  
110 two points and both the magnitude and direction of the subject vector are modified  
111 to approach the magnitude and direction of the reference vector. For a multi-atom  
112 system represented by vectors, the convergence of the magnitude (distance between  
113 atoms) to a reference value alone (listed e.g., in the force field) approximates the opti-  
114 mization effect from the bond term or other quantities that require an ideal separation  
115 between atoms. Together with the vector direction, all interactions for three-atom or  
116 larger systems can be optimized.

117 For the simple vector magnitude and direction convergence problem introduced,  
118 this work makes use of the CSwapGate to calculate the dot product of two qubit states  
119 [1, 29]. While different circuit topologies are possible, this work uses a variational  
120 circuit setup. Figure 2 shows the quantum circuit used.

121 The pre-processing step, which prepares the data, starts with computing the mag-  
122 nitude and direction of the subject and reference vectors. The calculated magnitude  
123 is normalized to the unit scale for encoding as an angle using the UGate. This work  
124 arbitrarily chooses to normalize the magnitude using the scheme shown below

$$f = \max(\|\mathbf{R}\|, \|\mathbf{S}\|) \quad (2)$$

$$\|\mathbf{R}\|_{norm} = \frac{\|\mathbf{R}\|}{f} \quad (3)$$

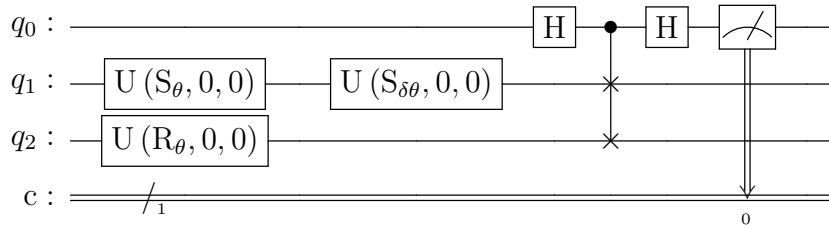

Figure 2: Quantum circuit using the CSwapGate. The circuit uses three qubits, where  $q_0$  is the control line employing two Hadamard gates and from which measurement is made. The encoded data is loaded as angles onto  $S_\theta$  and  $R_\theta$ , where  $S_\theta$  takes the subject value and  $R_\theta$  takes the reference value.  $S_{\delta\theta}$  acts as the variational parameter which is controlled by the optimizer.

$$\|\mathbf{S}\|_{norm} = \frac{\|\mathbf{S}\|}{f} \quad (4)$$

125 where  $\|\mathbf{R}\|$ , such that  $\{\mathbf{R} \in \mathbb{R} : \mathbf{R} \neq 0\}$ , and  $\|\mathbf{S}\|$ , such that  $\{\mathbf{S} \in \mathbb{R} : \mathbf{S} \neq 0\}$ , are  
 126 magnitudes of the reference and subject vectors and  $\|\mathbf{R}\|_{norm}$  and  $\|\mathbf{S}\|_{norm}$  are their  
 127 normalized counterparts which are then directly used, in radians, as angle inputs for  
 128 the UGate. In the case of direction, the angle quantity is directly used as input to  
 129 the UGate without normalization.

130 As the circuit is used in a variational form, the SPSA [30] optimizer available in  
 131 Qiskit is used to perturb the variational parameter with the minimizer acting on the  
 132 transformed dot product, see below. As introduced [1, 29], the equation to calculate  
 133 the dot product is given by

$$S = 1 - \frac{2 * b}{nShots} \quad (5)$$

134 where “b” is the number of shots that result in the state “1” and nShots is the total  
 135 number of shots attempted. The quantity “S” will approach “1” when the qubits are  
 136 in the same state. This value is transformed by subtracting from one, see Equation  
 137 6, for use with the minimizer.

$$S_{inv} = 1 - S \quad (6)$$

### 138 **Model 2: Vector alignment for planar molecular geometry optimization**

139 The previously discussed method for magnitude optimization was used to refine the  
140 irregular sides of an arbitrary hexagon such that they become regular. To this end,  
141 an irregular-hexagon was randomly generated, and an arbitrary reference value was  
142 used to transform the shape into a regular hexagon.

### 143 **Model 3: Vectors and protein structure alignment**

144 The method based on direction convergence discussed previously is used to align two  
145 structures of the protein ubiquitin (RCSB PDB ID: 1ubq), where one is the crystal  
146 structure and the other has undergone an arbitrary rotation in three dimensional  
147 space using VMD. Using the orient package in VMD, principal axes are calculated for  
148 both the original and rotated protein structures. The principal axes provide three unit  
149 vectors for each structure, the directions of which are systematically aligned across  
150 both structures. After direction convergence, new vectors and required transforma-  
151 tions are computed and applied to the rotated structure to map it to the original  
152 structure. An all-atom root mean square deviation (RMSD) is reported to assess the  
153 quality of the protein structure alignment.

### 154 **Model 4: Using variational quantum classifier for side chain rotamer clas-** 155 **sification**

156 In order to test the variational quantum classifier, the ubiquitin protein structure  
157 (RCSB PDB ID: 6l0l) was used to create a dataset. For this, the sidechain of each  
158 amino acid was rotated, using VMD, about the bond CA-CB bond axis, excluding  
159 the amino acids glycine, alanine and proline. The rotations were carried out in 0.1  
160 degree increments, creating 3,600 rotamer conformations (observations) per amino  
161 acid which were then saved as PDB files, with the only difference between the crystal  
162 structure and the new PDB structure being the single amino acid rotamer change.  
163 For each new conformation, a reference atom from the sidechain of the rotated amino  
164 acid was chosen, see supplementary Table 1 for a list of amino acids and their ref-  
165 erence atoms. The number of atoms within certain select cutoffs (namely 5Å, 4Å,  
166 3Å, 2Å) proximity were enumerated. These numbers act as features for the machine

167 learning models used in this work. For each of the 3,600 observations, per amino acid,  
168 total potential energy of the system was calculated making use of the NAMDEnergy  
169 plugin in NAMD with the charmm36 force field. The requirement of potential energy  
170 for this model required the protein structure to have hydrogens which were missing  
171 in ubiquitin structure previously selected. A solution-NMR (nuclear magnetic reso-  
172 nance) based structure which already had the hydrogens (PDB ID: 6l0l) was therefore  
173 used.

174 For use with a classification model, the energy values were divided into two classes,  
175 stable and unstable, with energy values at or below “0” kcal/mol being stable and  
176 those above “0” kcal/mol being unstable. The label for each class was “1” if a  
177 particular rotamer conformed to that class or “0” otherwise. In all instances, both  
178 labels were assigned. For model training, to ensure a balanced dataset, only amino  
179 acids where 50 values for each class were available, were chosen and correspondingly  
180 a 100-observation balanced dataset was generated.

181 The model used the ZZFeaturemap together with the EfficientSU2 ansatz with  
182 the four features mentioned above making use of the “rx” and “y” gates with circular  
183 entanglement, and employing the COBYLA optimizer. The 100-observation balanced  
184 dataset was split with 70% data used for training and 30% for testing. The same  
185 training and testing data was also used with a classical support vector classifier and  
186 the classification accuracy was determined for both the variational quantum classifier  
187 and the classical support vector classifier. As another performance measure the entire  
188 dataset of 3,600 observations per amino acid was used for prediction and the accuracy  
189 scores for both classical and quantum algorithms were computed.

190 To ascertain if the model training was robust, three trials each were carried out,  
191 per amino acid, and the accuracy determined for both the quantum and classical  
192 classifiers.

### 193 **Model 5: Quantum Monte Carlo simulation for rotamer energy landscape** 194 **profiling**

195 The Monte Carlo method was used to sample the rotamer energy landscape. A  
196 six-qubit string was used to represent a total of 64 ( $2^6$ ) states, each corresponding  
197 to a rotamer conformation of an amino acid, with consecutive states representing a



198 difference of  $\sim 5.6$  deg. The rotamers for each amino acid of ubiquitin (RCSB PDB  
199 ID 6l0l) were generated using the method stated earlier. The quantum circuit was  
200 empirically driven using six Hadamard gates, for the random generation of each of  
201 the six-qubits to represent a new state.

202 The transition of the states were accepted with a probability of “1” if the new  
203 state was more stable, that is the change in energy ( $Newstate - Oldstate$ ) is lesser  
204 than or equal to “0” ( $\delta E \leq 0$ ), or using the rule:

$$R \leq \exp^{-\frac{\delta E}{kT}} \quad (7)$$

205 where  $kT$  was set to “1” and  $R$  is a random number, in the event that the  $\delta E > 0$ .

206 The simulations were carried out for each amino acid for a total of 1000 Monte  
207 Carlo moves. The states and their corresponding energies were recorded.

208 For illustration purposes energy values were transformed using

$$E_{trans} = \begin{cases} \log_{10}(E) & \text{if } E > 0 \\ -1 * \log_{10}(E) & \text{if } E < 0 \\ 0 & \text{if } E = 0 \end{cases} \quad (8)$$

209 where “ $E$ ” is the energy and “ $E_{trans}$ ” is the transformed energy used for generating  
210 plots.

## 211 Results

### 212 Model 1: Encoding classical molecular data and molecular mechanics

213 Vector magnitudes and directions were compared across two vectors, a subject and  
214 a reference vector. Figure 3 shows a particular instance of this where the difference  
215 ( $abs(|reference| - |subject|) = 13.29AU$ ) between the magnitudes of the subject  
216 ( $|subject| = 25.98AU$ ) and reference ( $|reference| = 12.69AU$ ) vectors minimized to  
217 zero as the quantity ( $S_{inv}$ ) in Equation 6 is minimized using the quantum circuit  
218 illustrated in Figure 2.

219 Two angles ( $\theta, \phi$ ) are required to uniquely represent the direction of a vector in  
220 the spherical coordinate system. Figure 4 demonstrates results of using the same

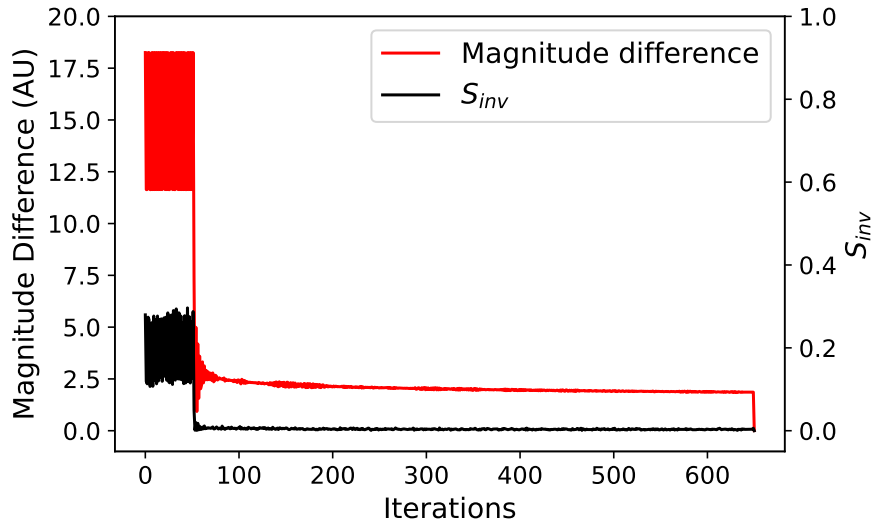

Figure 3: Minimization of magnitude difference and  $S_{inv}$ . The difference in the magnitudes of the subject and reference vector approaches “0” as the minimizer reduces  $S_{inv}$ . From the quantum circuit in Figure 2, the minimizer alters  $S_{\delta\theta}$  such that the state of the qubit carrying the magnitude of the subject vector approaches the state of the reference qubit, in turn resulting in magnitude of the support vector converging to the magnitude of the reference vector.

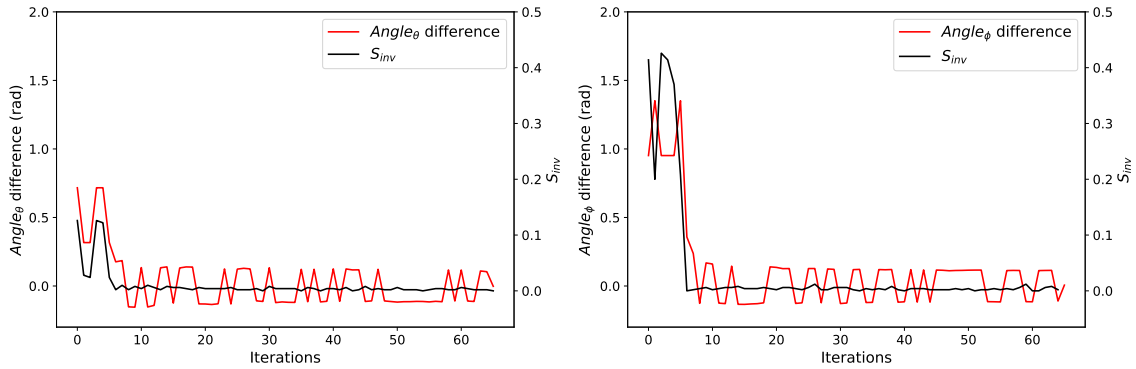

Figure 4: Minimization of angle difference and  $S_{inv}$ . To uniquely represent a vector, two angles ( $\theta$ ,  $\phi$ ) are needed. Using the same quantum circuit as shown in Figure 2, the difference in the individual angles of the subject and reference vector are minimized as the minimizer reduces  $S_{inv}$ . For ease of illustration, only every 10th iteration is plotted.

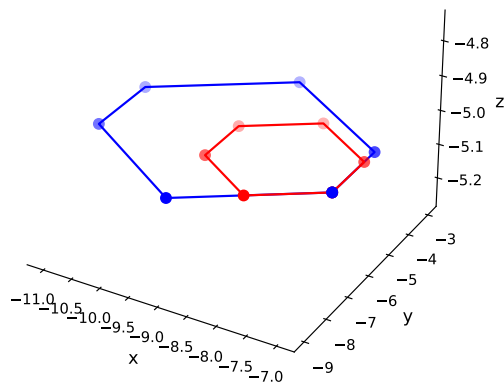

Figure 5: Optimization of the sides of a hexagon. The quantum model demonstrated above is used to optimize the sides of a hexagon. The blue figure represents a randomly generated hexagon, whose sides are modified to be regular ( $1.5AU$ ), using the magnitude difference minimization method detailed earlier.

221 circuit as used for the magnitude to ensure directions align between the subject  
222 ( $\theta = 1.15\text{rad}, \phi = 2.03\text{rad}$ ) and the reference ( $\theta = 0.73\text{rad}, \phi = 0.98\text{rad}$ ) vectors  
223 by minimizing the difference between them.

224 While in this work only one case each for magnitude and direction is illustrated,  
225 the method can readily be adapted to explore other cases.

## 226 **Model 2: Vector magnitude for planar molecular geometry optimization**

227 This model presents optimizing the sides of a hexagon as a use case for the quantum  
228 circuit and the classical data encoding method discussed above. This problem bears  
229 similarity with refinement of bond length of planar molecules, e.g., benzene. In this  
230 example, all sides are chosen to have an arbitrary length of  $1.5AU$ . Figure 5 shows  
231 the starting (Blue) and final (Red) states of the system, and illustrates that the final  
232 state adopts a regular hexagonal topology.

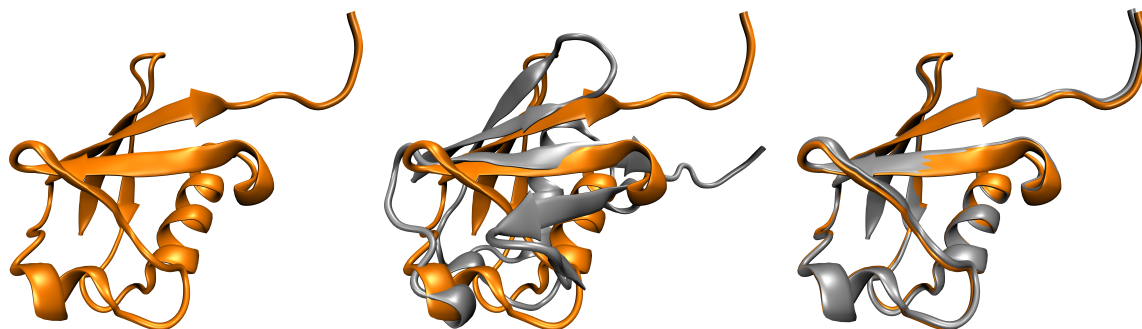

Figure 6: Protein structure alignment. The crystal structure of ubiquitin from RCSB PDB (left; orange) was arbitrarily rotated about  $x$ ,  $y$  and  $z$ -axes (middle), with the rotated structure shown in gray. Using the vector direction alignment model, the rotated structure was aligned with the original structure (right). The alignment resulted in an all-atom RMSD of 0.4 Å.

### 233 **Model 3: Vectors direction alignment and protein structure alignment**

234 Protein structure alignment is presented as a use case of aligning vector directions.  
235 Figure 6 shows the rigid transform of a protein structure, with the transform com-  
236 prising 3D rotations about the axes ( $x = 45deg, y = 35deg, z = 25deg$ ). To achieve  
237 an alignment between the transformed and original structure, the direction alignment  
238 model is used. Figure 6 shows the result of the alignment with an RMSD value of  
239  $\sim 0.4\text{\AA}$ .

240 As stated earlier, while only one case is demonstrated in the work, the method  
241 can be used for rigid alignments between transformed structures.

### 242 **Model 4: Using variational quantum classifier for side chain rotamer clas-** 243 **sification**

244 To generate the dataset for this model, the ubiquitin protein structure, comprising 82  
245 amino acids was used and 3,600 sidechain rotamer conformations (observations) were  
246 generated for all amino acids excluding the glycine, alanine and proline as listed in the  
247 methods section. Subsequently only 45 amino acids were used as only these allowed  
248 creation of balanced 100-observation datasets, of which 50-observations had the clas-  
249 sification “stable” and the other 50-observations “unstable”. Remaining amino acids  
250 had less than 50 out of 3,600-observations in either “stable” or “unstable” classes.

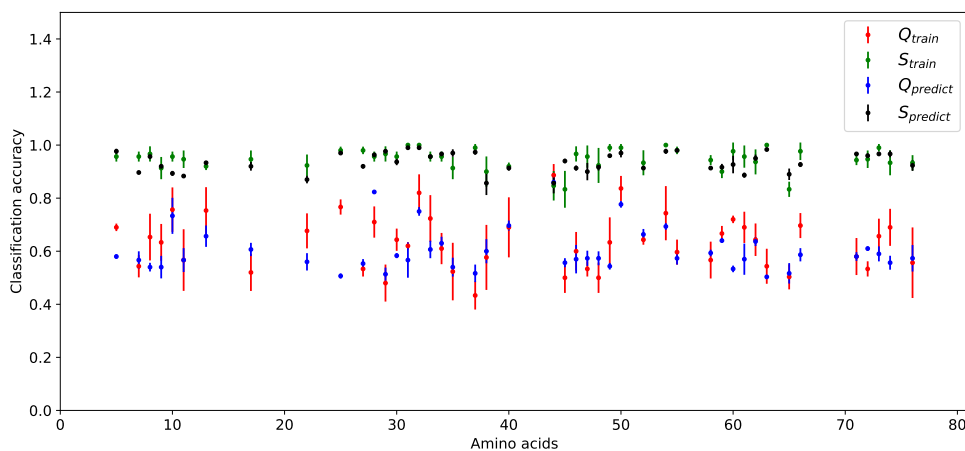

Figure 7: Comparison of classical and quantum classifiers. Overall the classical classifier performs better ( $S_{train}, S_{pred}$ ) than the quantum classifier ( $Q_{train}, Q_{pred}$ ) both on the training and prediction datasets. Three runs are carried out for training and prediction, with the quantum-based classification showing a much higher spread of accuracy across trials both for training (red) and prediction (blue).

251 Figure 7 shows the comparison of the classification accuracy for the 45 amino acids  
252 using both the quantum and the classical classifiers. Additionally the classification  
253 accuracy achieved during the model training stage is shown alongside the classification  
254 accuracy achieved after using the same trained model to classify all 3,600 rotamers  
255 which included 100-observations from the training data and 3,500 observations which  
256 were novel for the model.

257 For each dataset, both training and prediction, three trials were conducted to  
258 gauge robustness of the classifiers compared.

259 Overall the classical classification model outperformed the quantum classifier.  
260 With an average scoring accuracy of  $\sim 60\%$  across both training and prediction  
261 datasets, the quantum classifier shows a much higher spread of prediction accuracy.

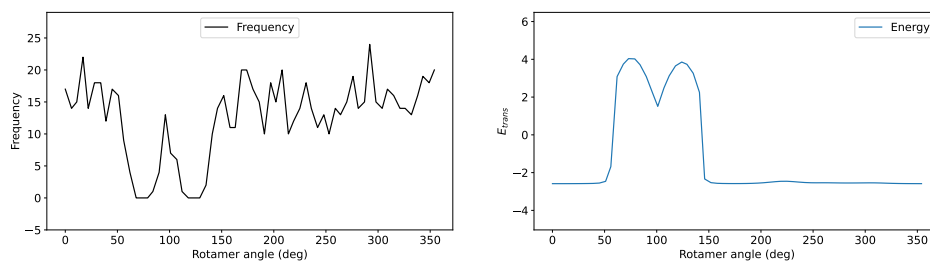

(a) Amino acid # 66

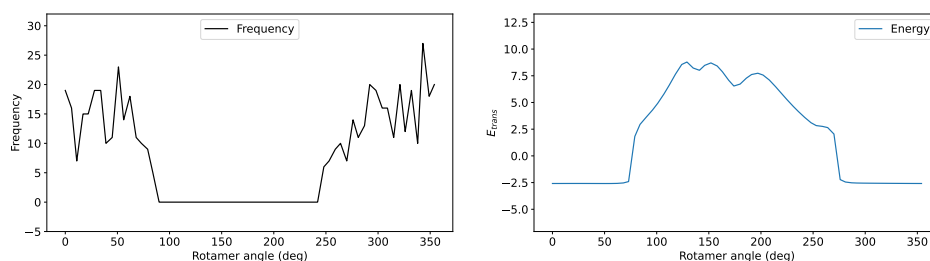

(b) Amino acid # 72

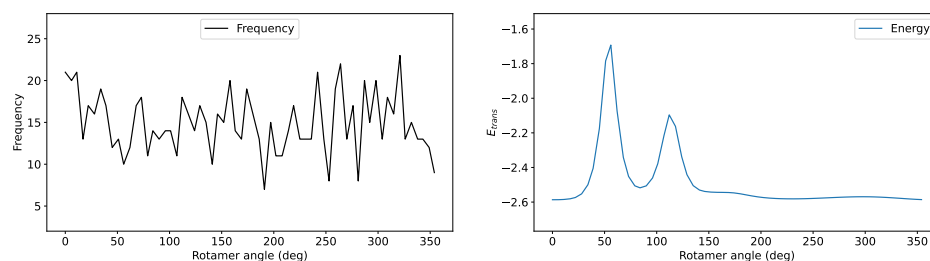

(c) Amino acid # 64

Figure 8: Monte Carlo simulation for rotamer energy profiling. Results of the states sampled using Monte Carlo simulation are shown for three amino acids. Amino acids 66 and 72, show an inverse correlation between rotamer energy and the occupancy profile as expected. For amino acid 64, given all rotamer states have  $E_{trans} < 0$ , (a) all states are uniformly visited.

## 262 **Model 5: Quantum Monte Carlo simulation for rotamer energy landscape** 263 **profiling**

264 Using a 6-qubit string, 64 rotamer states were represented for each amino acid, with  
265 each state  $\sim 5.6$  *deg* apart from its next subsequent state. The energy of each new  
266 state was computed and the new state accepted or rejected using the rules listed in  
267 the methods section. Figure 8(a,b) show the case of two amino acids (66 and 72), both  
268 of which clearly show an inverse relationship between states visited (Figure 8: left  
269 panel) and their corresponding energetic signatures (Figure 8: right panel). For the  
270 1000 Monte Carlo step simulation carried out for each amino acid, high occupancy  
271 (Frequency) is seen for low energy states and vice versa. Another case of amino  
272 acid 64 is shown in Figure 8 (c), where all energy values ( $E_{trans}$ ) sampled are below  
273 “0”, resulting in uniform occupancy for all rotamer states. The results for all amino  
274 acids are included in the supplementary material which reproduces similar expected  
275 behavior.

## 276 **Discussion**

277 This work, using empirical models, demonstrates how classical data can be used with  
278 quantum computers. In classical molecular mechanics atomic coordinates are per-  
279 turbed to achieve a desired state, representing some energy minimum. The reference  
280 state is usually encoded in force fields. The first use case, presented in this work,  
281 demonstrates an analogous case where two points in 3D ( $x, y, z$ ) coordinates are ex-  
282 pressed using spherical coordinates ( $r, \theta, \phi$ ). To ensure that the subject converges to  
283 the reference state, the spherical coordinates ( $r, \theta, \phi$ ) are directly loaded onto qubit  
284 using the UGate. Together with the CSwapGate, the dot product is computed al-  
285 lowing for the direct comparison of the two qubits and indirectly the same for the  
286 encoded coordinates and any resulting difference then minimized.

287 This model and its variations used to compare both vector magnitudes and di-  
288 rections has significant implications in the area of molecular mechanics as it can be  
289 tied together with various optimization routines to achieve desired states of molecular  
290 systems. This work demonstrates, without quantum advantage, and using empirical

291 systems utility of this basic model to optimize geometries of molecules using a hybrid  
292 classical-quantum computing workflow.

293     Apart from the above model, this work also shows the use of quantum machine  
294 learning with biological data. Although the example does not demonstrate quantum  
295 advantage, and the classical classifier outperforms the quantum classifier, the example  
296 demonstrates the use of classical data from geometry optimization problem-space with  
297 a quantum machine learning algorithm. In addition to the above, the same data is  
298 used to carry out Monte Carlo simulations.

299     As stated earlier, encoding classical data for use with quantum algorithms presents  
300 a significant challenge in this area. This work presents some ideas for encoding data  
301 that can further help with the development of quantum algorithms and eventually  
302 achieving quantum advantage.

## 303 **Conclusion**

304 Using conventional examples of molecular geometry optimization, this work acts as a  
305 primer to familiarize the wider community working in the area of molecular mechanics  
306 with quantum computing. While quantum advantage is not demonstrated in this  
307 work, it successfully demonstrates encoding of classical molecular data for use with  
308 quantum computers. By presenting several models working in different ways, this  
309 work is expected to draw attention from the wider community and hopefully future  
310 work will demonstrate quantum advantage which in turn will benefit the area of  
311 molecular mechanics and consequently drug discovery.

## 312 **Data and Software Availability**

313 Python notebooks and the data used in this work can be made available on request.

## 314 **Declarations of interest**

315 Declarations of interest: none



## 316 Acknowledgement

## 317 Funding

318 The work was funded by a grant under the Quantum Engineering Program (QEP-  
319 SF4) by the National University of Singapore.

## 320 References

- 321 [1] Esma Aïmeur, Gilles Brassard, and Sébastien Gambs. Machine learning in a  
322 quantum world. In *Conference of the Canadian Society for Computational Stud-*  
323 *ies of Intelligence*, pages 431–442. Springer, 2006.
- 324 [2] Gerhard Klebe. *Experimental Methods of Structure Determination*, pages 265–  
325 290. Springer Berlin Heidelberg, Berlin, Heidelberg, 2013.
- 326 [3] Daan Frenkel and Berend Smit. *Understanding molecular simulation: from al-*  
327 *gorithms to applications*, volume 1. Elsevier, 2001.
- 328 [4] Garrett M. Morris and Marguerita Lim-Wilby. *Molecular Docking*, pages 365–  
329 382. Humana Press, Totowa, NJ, 2008.
- 330 [5] Britta Nisius, Fan Sha, and Holger Gohlke. Structure-based computational anal-  
331 ysis of protein binding sites for function and druggability prediction. *Journal of*  
332 *biotechnology*, 159(3):123–134, 2012.
- 333 [6] Carlos Pintado-Grima, Oriol Bárcenas, Andrea Bartolomé-Nafria, Marc Fornt-  
334 Suñé, Valentín Iglesias, Javier Garcia-Pardo, and Salvador Ventura. A review  
335 of fifteen years developing computational tools to study protein aggregation.  
336 *Biophysica*, 3(1):1–20, 2023.
- 337 [7] Daniel A Polasky and Alexey I Nesvizhskii. Recent advances in computational  
338 algorithms and software for large-scale glycoproteomics. *Current Opinion in*  
339 *Chemical Biology*, 72:102238, 2023.

- 340 [8] Mohit Pandey, Michael Fernandez, Francesco Gentile, Olexandr Isayev, Alexan-  
341 der Tropsha, Abraham C Stern, and Artem Cherkasov. The transformational  
342 role of gpu computing and deep learning in drug discovery. *Nature Machine*  
343 *Intelligence*, 4(3):211–221, 2022.
- 344 [9] John E Stone, David J Hardy, Ivan S Ufimtsev, and Klaus Schulten. Gpu-  
345 accelerated molecular modeling coming of age. *Journal of Molecular Graphics*  
346 *and Modelling*, 29(2):116–125, 2010.
- 347 [10] Mark James Abraham, Teemu Murtola, Roland Schulz, Szilárd Páll, Jeremy C  
348 Smith, Berk Hess, and Erik Lindahl. Gromacs: High performance molecular sim-  
349 ulations through multi-level parallelism from laptops to supercomputers. *Soft-*  
350 *wareX*, 1:19–25, 2015.
- 351 [11] Tai-Sung Lee, David S Cerutti, Dan Mermelstein, Charles Lin, Scott LeGrand,  
352 Timothy J Giese, Adrian Roitberg, David A Case, Ross C Walker, and Darrin M  
353 York. Gpu-accelerated molecular dynamics and free energy methods in amber18:  
354 performance enhancements and new features. *Journal of chemical information*  
355 *and modeling*, 58(10):2043–2050, 2018.
- 356 [12] Emanuel Knill. Quantum computing. *Nature*, 463(7280):441–443, 2010.
- 357 [13] John Preskill. Quantum computing in the nisq era and beyond. *Quantum*, 2:79,  
358 2018.
- 359 [14] Alberto Peruzzo, Jarrod McClean, Peter Shadbolt, Man-Hong Yung, Xiao-Qi  
360 Zhou, Peter J Love, Alán Aspuru-Guzik, and Jeremy L O’Brien. A variational  
361 eigenvalue solver on a photonic quantum processor. *Nature communications*,  
362 5(1):4213, 2014.
- 363 [15] Abhinav Kandala, Antonio Mezzacapo, Kristan Temme, Maika Takita, Markus  
364 Brink, Jerry M Chow, and Jay M Gambetta. Hardware-efficient variational  
365 quantum eigensolver for small molecules and quantum magnets. *nature*,  
366 549(7671):242–246, 2017.

- 367 [16] Jacob Biamonte, Peter Wittek, Nicola Pancotti, Patrick Rebentrost, Nathan  
368 Wiebe, and Seth Lloyd. Quantum machine learning. *Nature*, 549(7671):195–202,  
369 2017.
- 370 [17] M Cerezo, Guillaume Verdon, Hsin-Yuan Huang, Lukasz Cincio, and Patrick J  
371 Coles. Challenges and opportunities in quantum machine learning. *Nature Com-  
372 putational Science*, 2(9):567–576, 2022.
- 373 [18] Adam Bouland, Wim van Dam, Hamed Joorati, Iordanis Kerenidis, and Anu-  
374 pam Prakash. Prospects and challenges of quantum finance. *arXiv preprint  
375 arXiv:2011.06492*, 2020.
- 376 [19] Vikram Khipple Mulligan, Hans Melo, Haley Irene Merritt, Stewart Slocum,  
377 Brian D. Weitzner, Andrew M. Watkins, P. Douglas Renfrew, Craig Pelissier,  
378 Paramjit S. Arora, and Richard Bonneau. Designing peptides on a quantum  
379 computer. *bioRxiv*, 2020.
- 380 [20] Anton Robert, Panagiotis Kl Barkoutsos, Stefan Woerner, and Ivano Tavernelli.  
381 Resource-efficient quantum algorithm for protein folding. *npj Quantum Infor-  
382 mation*, 7(1):38, 2021.
- 383 [21] Renata Wong and Weng-Long Chang. Fast quantum algorithm for protein struc-  
384 ture prediction in hydrophobic-hydrophilic model. *Journal of Parallel and Dis-  
385 tributed Computing*, 164:178–190, 2022.
- 386 [22] Diego Riste, Marcus P Da Silva, Colm A Ryan, Andrew W Cross, Antonio D  
387 Córcoles, John A Smolin, Jay M Gambetta, Jerry M Chow, and Blake R John-  
388 son. Demonstration of quantum advantage in machine learning. *npj Quantum  
389 Information*, 3(1):16, 2017.
- 390 [23] Sergey Bravyi, David Gosset, and Robert König. Quantum advantage with  
391 shallow circuits. *Science*, 362(6412):308–311, 2018.
- 392 [24] Andrew J Daley, Immanuel Bloch, Christian Kokail, Stuart Flannigan, Natalie  
393 Pearson, Matthias Troyer, and Peter Zoller. Practical quantum advantage in  
394 quantum simulation. *Nature*, 607(7920):667–676, 2022.

- 395 [25] Héctor Abraham et. al. Qiskit: An open-source framework for quantum com-  
396 puting, 2021.
- 397 [26] William Humphrey, Andrew Dalke, and Klaus Schulten. VMD – Visual Molec-  
398 ular Dynamics. *Journal of Molecular Graphics*, 14:33–38, 1996.
- 399 [27] James C Phillips, David J Hardy, Julio DC Maia, John E Stone, João V Ribeiro,  
400 Rafael C Bernardi, Ronak Buch, Giacomo Fiorin, Jérôme Hénin, Wei Jiang,  
401 et al. Scalable molecular dynamics on cpu and gpu architectures with namd.  
402 *The Journal of chemical physics*, 153(4):044130, 2020.
- 403 [28] Matteo Masetti and Walter Rocchia. Molecular mechanics and dynamics: numer-  
404 ical tools to sample the configuration space. *Frontiers in Bioscience-Landmark*,  
405 19(4):578–604, 2014.
- 406 [29] Dawid Kopiczyk. Quantum machine learning for data scientists. *arXiv preprint*  
407 *arXiv:1804.10068*, 2018.
- 408 [30] James C Spall. An overview of the simultaneous perturbation method for efficient  
409 optimization. *Johns Hopkins apl technical digest*, 19(4):482–492, 1998.
